# Supplementary material for: Comparison of Diagnostic Test Accuracy of Cone-Beam Breast Computed Tomography and Digital Breast Tomosynthesis for Breast Cancer: A Systematic Review and Meta-Analysis Approach
Source: MDPI journal article supplement (doi:10.3390/s22093594), 2022-05-09
Supplement: s1 [file s1]

Table S1. Summary of the description of Medical Subject Headings (MeSH) for the cone-beam breast computed tomography (CBBCT) arm.

|    | <b>Search Terms</b>                        |
|----|--------------------------------------------|
| #1 | Breast cancer (MeSH);2015-2021             |
| #2 | Sensitivity(MeSH)                          |
| #3 | Specificity(MeSH)                          |
| #4 | Cone-beam breast computed tomography(MeSH) |
| #5 | #1AND#2AND#3AND#4                          |

Table S2. Summary of the description of Medical Subject Headings (MeSH) for the digital breast tomosynthesis (DBT) arm.

|    | <b>Search Terms</b>                                                                                                  |
|----|----------------------------------------------------------------------------------------------------------------------|
| #1 | Breast cancer (MeSH);2015-2021                                                                                       |
| #2 | Sensitivity(MeSH)                                                                                                    |
| #3 | Specificity(MeSH)                                                                                                    |
| #4 | Digital breast tomosynthesis (MeSH) <b>OR</b> X-ray Breast Tomosynthesis(MeSH) <b>OR</b> Breast Tomosynthesis (MeSH) |
| #5 | #1AND#2AND#3AND#4                                                                                                    |

Table S3. Summary of the description of text-word (tw) for the cone-beam breast computed tomography (CBBCT) arm.

|    | Search Terms                                                                                                                                                 |
|----|--------------------------------------------------------------------------------------------------------------------------------------------------------------|
| #1 | breast cancer (tw) <b>OR</b> breast carcinoma (tw) <b>OR</b> breast tumor (tt) <b>OR</b> malignant breast tumor (tw) <b>OR</b> benign breast tumor 2015-2021 |
| #2 | sensitivity(tw) <b>OR</b> [true positive(tw) <b>AND</b> false negative(tw)]                                                                                  |
| #3 | specificity(tw) <b>OR</b> [true negative(tt) <b>AND</b> positive(tt)]                                                                                        |
| #4 | cone-beam breast computed tomography(tw) <b>OR</b> dedicated breast computed tomography(tw) <b>OR</b> breast CT (tw)                                         |
| #5 | #1 <b>AND</b> #2 <b>AND</b> #3 <b>AND</b> #4                                                                                                                 |

Table S4. Summary of the description of text-word (tw) for the digital breast tomosynthesis(DBT) arm.

|    | Search Terms                                                                                                                                                 |
|----|--------------------------------------------------------------------------------------------------------------------------------------------------------------|
| #1 | breast cancer (tw) <b>OR</b> breast carcinoma (tw) <b>OR</b> breast tumor (tw) <b>OR</b> malignant breast tumor (tw) <b>OR</b> benign breast tumor 2015-2021 |
| #2 | sensitivity(tw) <b>OR</b> [true positive(tt) <b>AND</b> false negative(tt)]                                                                                  |
| #3 | specificity(tw) <b>OR</b> [true negative(tw) <b>AND</b> positive(tw)]                                                                                        |
| #4 | digital breast tomosynthesis (tw) <b>OR</b> x-ray breast tomosynthesis(tw) <b>OR</b> breast tomosynthesis (tw) <b>OR</b> 3D mammography                      |
| #5 | #1 <b>AND</b> #2 <b>AND</b> #3 <b>AND</b> #4                                                                                                                 |
